# Supplementary material
Source: Research Square preprint supplement (doi:10.21203/rs.3.rs-9739359/v1)
Supplement: Supplementary file 1 [file 5eea8c8f81deea6be39201fb.xlsx]

## Sheet: S1
S1: Mean and range performance of 22 common bean genotypes
Treatment_means	Days to 50% flowering	No. of primary branches	No. of secondary branches	Days to maturity	Plant height cm	No. Of Pods per cluster	No. Of Pods per plant	Pod length (cm)	No. Of Seeds per pod	seed weight (g)	Seed yield per plot (g)
White mottled kholar	51.5	3.7	5.1	87	96.07	1.8	7.5	10.8	4.9	32.5	111
TSG1	54	3.8	5.2	94	131.89	2	7.7	11.7	5.4	38	125
TSG2	51.5	3	4.1	80	73.35	2	7.2	10.65	5	37	86
TSG3	49	3	4.2	80	34.39	1.8	6.2	11.45	5.5	40	146.5
Luli	48	4.3	5.5	90	45.42	2.2	8.1	13.25	6.4	43.5	181
Tsukmerem	54	3.2	4.5	94	93.6	2	6.5	10.7	5	39	122.5
Kholar with black stripe	48	3.6	4.7	90	152.91	1.9	7.6	10.9	5.1	27	101.5
Small light brown kholar	49	3.5	4.6	82	123.51	1.8	7.2	10.85	5.1	34	112.5
Light brown kholar	49	3.6	5	82	82.07	1.7	7.2	9.8	4.8	30.5	87
Deep red kholar	48.5	4.3	5.4	90	162.04	2.2	8.2	13.25	6.4	47	217.5
Khouthi	49	2.9	3.9	80	92.71	1.9	6.8	10.75	5.2	31	91
Kholar white small	49	2.7	3.8	80	75.16	2	6.1	9.7	4.5	26	71
Kholar light brown with maroon stripe	51.5	2.9	4.1	87	143.78	1.8	6.6	10.8	5.1	43	158.5
Kholar brown medium	51.5	2.9	4	87	79.57	1.8	6.8	10.65	5.2	36	101.5
Kholar Yellow large	48	3.7	4.9	90	75.84	2	7.3	12.25	5.7	43	127.5
Rutsu	49	2.7	3.7	84	34.14	1.8	6.2	9.25	4.6	30	75.5
Korika	48	3.8	4.8	90	131.79	1.9	7.2	11.4	5.4	38	122.5
Kholar Brown	51.5	3.2	4.3	94	68.15	2.3	7	11.7	5.5	27	81
Kholar medium brown with maroon stripe	54	2.8	3.7	87	142.67	1.7	6.6	11	5.3	39.5	153.5
Zorin	49	2.9	4.2	80	65.32	2	6.3	11.25	5.5	32	82
Yellow Kholar	51.5	3.8	4.9	87	130.87	2.1	7.6	10.75	5.1	34	123.5
Kholar Dark brown	54	3.3	4.5	94	97.02	1.9	6.9	10.5	5	36	115
Min	48	2.7	3.7	80	34.14	1.7	6.1	9.25	4.5	26	71
Max	54	4.3	5.5	94	162.04	2.3	8.2	13.25	6.4	47	217.5
mean	50.4375	3.35833	4.5125	86.7917	97.0187	1.94167	7.04583	11.0771	5.275	35.7083	120.062

## Sheet: S2
S2: MGIDI value of 22 french bean genotypes
Genotype	MGIDI
G10	2.09629
G2	2.21968
G15	2.81458
G6	2.82121
G22	2.92294
G5	2.95152
G21	3.06381
G17	3.15422
G13	3.41541
G14	3.44272
G19	3.57424
G1	3.57872
G3	3.65581
G18	3.99812
G8	4.03519
G7	4.08906
G11	4.18601
G20	4.22675
G4	4.30786
G9	4.76333
G16	4.78092
G12	4.86718

## Sheet: S3
S4: factor analysis
VAR	FA1	FA2	FA3	FA4	Communality	Uniquenesses
DF	0.223453	0.903308	-0.0243719	-0.111346	0.878889	0.121111
NPB	-0.912216	-0.0351026	0.311099	0.174585	0.960634	0.0393659
NSB	-0.884102	-0.00761589	0.257748	0.176612	0.879321	0.120679
DM	-0.42831	0.730436	0.17385	0.290134	0.831388	0.168612
PH	-0.520268	0.393291	0.179006	-0.519564	0.727346	0.272654
NPPC	-0.316254	0.112521	0.128921	0.843744	0.841202	0.158798
NPPP	-0.908203	0.0383761	0.248218	0.130343	0.904907	0.0950927
PL	-0.437591	-0.034957	0.734472	0.455509	0.939646	0.0603541
NSPP	-0.353921	-0.124758	0.771345	0.449242	0.937616	0.0623837
SI	-0.10413	0.126818	0.935268	-0.0502896	0.904181	0.0958193
SYPP	-0.324665	0.107243	0.900562	-0.0670364	0.932414	0.0675861
PC	PC1	PC2	PC3	PC4
Eigenvalues	5.63622	1.62905	1.36495	1.10734
Variance (%)	51.2383	14.8095	12.4086	10.0667
Cum. variance (%)	51.2383	66.0478	78.4564	88.5231
